# Supplementary material
Source: publisher site journal article supplement (https://www.dovepress.com/article/441509)
Supplement: Supplementary file 1 [file get_supplementary_file.php]

|  | **Mean (SD)** | **Range** |
| --- | --- | --- |
| **Worry** |  |  |
| Short sleep duration | 47.0 (12.3) | 29-70 |
| Typical sleep duration | 38.6 (9.1) | 19-55 |
| Long sleep duration | 39.8 (11.4) | 24-64 |
| **Brooding** |  |  |
| Short sleep duration | 8.7 (2.8) | 5 – 16 |
| Typical sleep duration | 7.5 (2.0) | 5 – 13 |
| Long sleep duration | 7.9 (1.8) | 5 – 12 |

**Supplementary Table 1.** *Mean worry and brooding levels for participants with short, typical and long sleep durations.*

*A tertial split was used to classify participants into different sleep duration categories based on their objective polysomnography-derived sleep measurements, with participants in the highest tertile classified as long sleepers, participants in the lowest tertile short sleepers, and the middle tertile as typical sleepers.*
